# Supplementary material for: Tissue-specific in vivo genetic toxicity of nine polycyclic aromatic hydrocarbons assessed using the Muta™Mouse transgenic rodent assay
Source: PubMed Central journal article supplement — Toxicol Appl Pharmacol. 2016 Jan 1;290:31–42. doi: 10.1016/j.taap.2015.11.010 (PMC4712826; doi:10.1016/j.taap.2015.11.010), 2016-01-01
Supplement: mmc1.pdf [file mmc1.pdf]

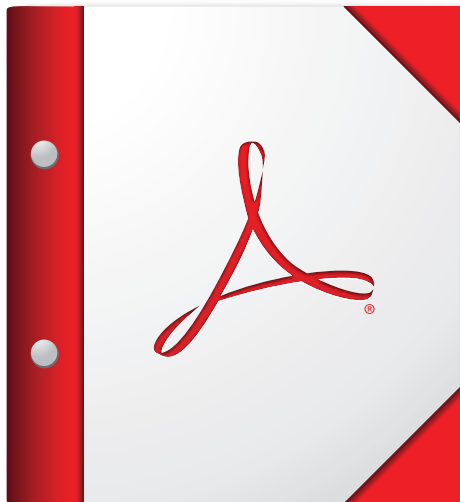

**For the best experience, open this PDF portfolio in  
Acrobat 9 or Adobe Reader 9, or later.**

[Get Adobe Reader Now!](#)
